# Supplementary material for: Synthesis and magnetism of ε-Fe3N submicrorods for magnetic resonance imaging
Source: Royal Society of Chemistry journal article supplement (doi:10.1039/c5dt03762j), 2015-11-13
Supplement: c5dt03762j1.pdf [file c5dt03762j1.pdf]

## Synthesis and Magnetism of $\epsilon$ - $\text{Fe}_3\text{N}$ Submicrorods for Magnetic Resonance Imaging

Peng Zhang, Xiaobai Wang, Wei Wang, Xiang Lei and Hua Yang\*

College of Chemistry, Jilin University, 130012, China

\*E-mail: [Huayang86@sina.com](mailto:Huayang86@sina.com)

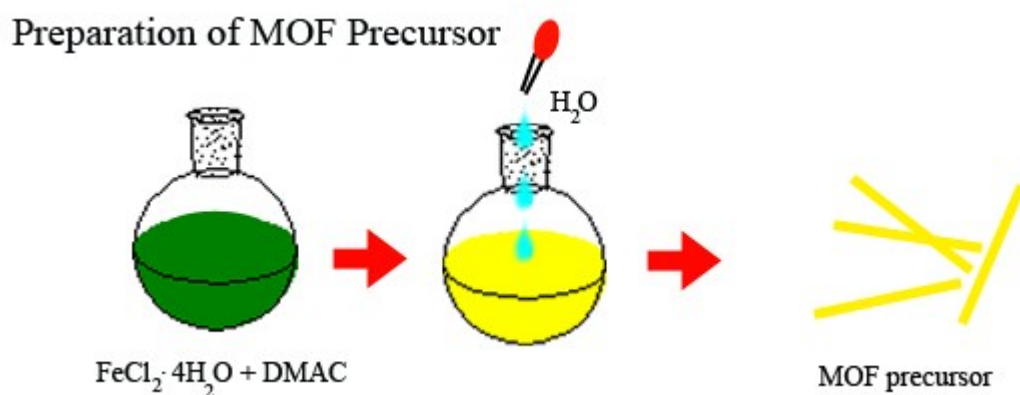

Figure S1 preparation of MOF precursor

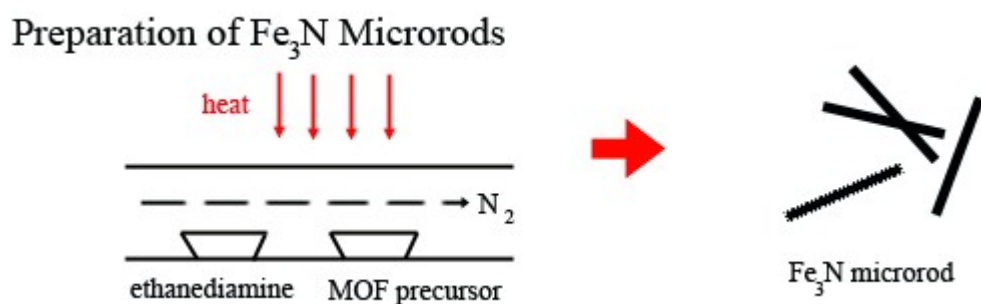

Figure S2 preparation of  $\text{Fe}_3\text{N}$  submicrorods

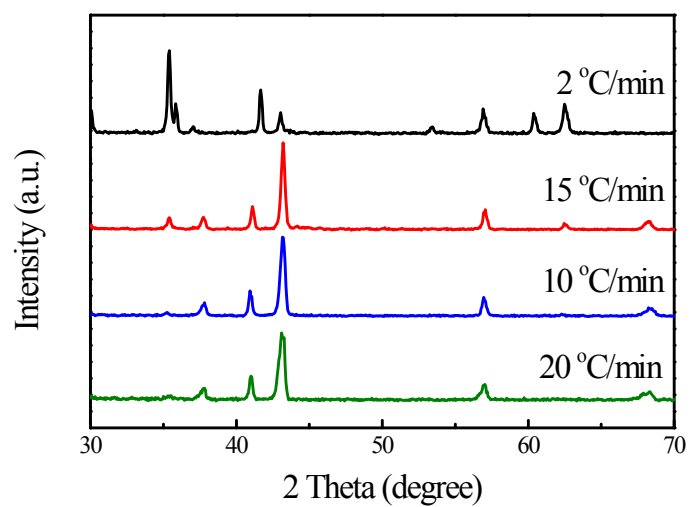

Figure S3 XRD patterns of samples calcinated at different heating rates

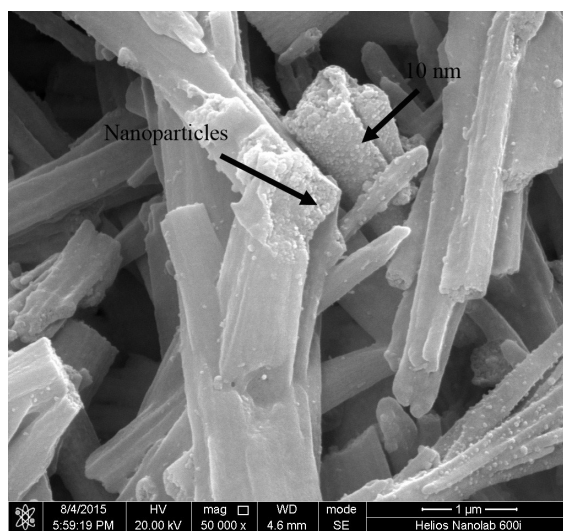

Figure S4 the detailed magnification of Fe<sub>3</sub>N submicrorods

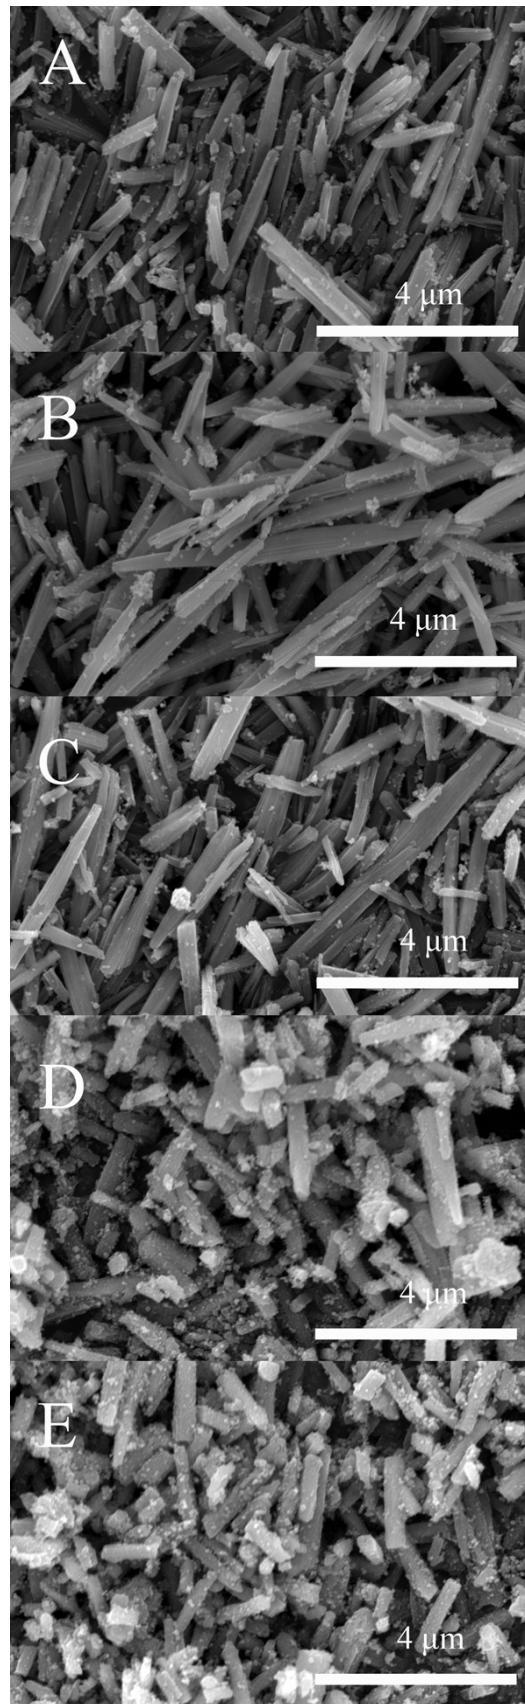

Figure S5 SEM images of samples calcinated at different temperatures (A-400 °C, B-500 °C, C-540 °C, D-560 °C, E-700 °C)

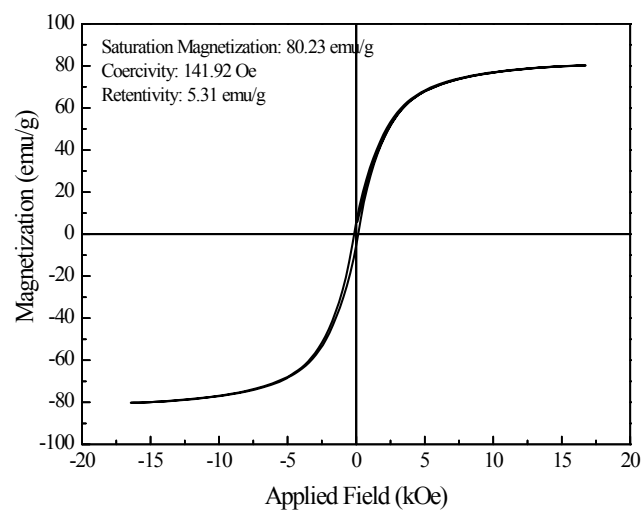

Figure S6 Fe<sub>3</sub>N particles prepared from the sol-gel method
